# Supplementary material for: A novel catalytic one-pot synthesis of carbazoles via consecutive amination and C–H activation
Source: Royal Society of Chemistry journal article supplement (doi:10.1039/b207712b), 2002-01-01
Supplement: b207712b.doc [file b207712b.doc]

**General procedure for the synthesis of the *N*-benzyl-2-haloanilines:**

(Modification of published procedure: J. H. Tidwell, S. L. Buchwald, *J. Am. Chem. Soc.*, 1994, **116**, 11797).

In a flame-dried three-necked flask, a solution of 2-haloaniline (49.7 mmol) in tetrahydrofuran (150 ml) was cooled to -78ºC. *n*-Butyllithium in hexane (1.6 M, 32 ml, 51.2 mmol) was slowly added dropwise and the solution was stirred at -78ºC for 30 minutes. Benzylbromide (5.9 ml, 49.6 mmol) was added slowly *via* a syringe and the reaction mixture was allowed to warm slowly to room temperature overnight. Water (10 ml) was added to quench the reaction and the aqueous phase was extracted with ethyl acetate (5 x 30 ml). The combined organic extracts were washed with a saturated solution of sodium carbonate (4 x 100 ml) and water (100 ml). The solution was dried over magnesium sulphate, filtered through celite, and the solvents were removed on a rotary evaporator. The product was purified by flash chromatography.

# *N*-benzyl-2-chloroaniline

Yellow oil (8.508g, 79%).

1H-NMR (CDCl3),  (ppm): 4.30 (s, 2H, CH2), 4.64, (br s, 1H, NH), 6.53 (dd, 4*J*(H6H4) = 1.4 Hz, 3*J*(H6H5) = 8.2 Hz, 1H, H6), 6.55 (ddd, 4*J*(H4H6) = 1.4 Hz, 3*J*(H4H5) = 7.6 Hz, 3*J*(H4H3) = 7.65 Hz, 1H, H4), 6.99 (ddd, 4*J*(H5H3) = 1.5 Hz, 3*J*(H5H4) = 7.6 Hz, 3*J*(H5H6) = 8.2 Hz, 1H, H5), 7.09-7.35 (m, 6H, H3 and 5H phenyl). 13C-{1H}-NMR (CDCl3),  (ppm): 47.6 (s, CH2), 111.4 (s, CH, C6), 117.3 (s, CH, C4), 118.9 (s, C, C2), 127.1 (s, CH, phenyl), 127.2 (s, CH, C11), 127.7 (s, CH, C5), 128.6 (s, CH, phenyl), 129.0 (s, CH, C3), 138.6 (s, C, C8), 143.7 (s, C, C1). HRMS (CI) [M+H]+ Calcd for C13H12NCl: 218.0736, found: 218.0734. Anal. found: C, 71.6; H, 5.6; N, 6.4. Calcd for C13H12ClN: C, 71.7; H, 5.6; N, 6.4%.

# *N*-benzyl-2-bromoaniline

Orange oil (12.315g, 95%).

1H-NMR (CDCl3),  (ppm): 4.42 (s, 2H, CH2), 4.80 (br s, 1H. NH), 6.60 (ddd, 4*J*(H4H6) = 1.5 Hz, 3*J*(H4H5) = 7.3 Hz, 3*J*(H4H3) = 7.8 Hz, 1H, H4), 6.63 (dd, 4*J*(H6H4) = 1.5 Hz, 3*J*(H6H5) = 8.1 Hz, 1H, H6), 7.15 (ddd, 4*J*(H5H3) = 1.5 Hz, 3*J*(H5H4) = 7.3 Hz, 3*J*(H5H6) = 8.1 Hz, 1H, H5), 7.27-7.41 (m, 5H, phenyl), 7.46 (dd, 4*J*(H3H5) = 1.5 Hz, 3*J*(H3H4) = 7.8 Hz, 1H, H3). 13C-{1H}-NMR (CDCl3),  (ppm): 47.9 (s, CH2, C7), 109.6 (s, C, C2), 111.5 (s, CH, C6), 117.9 (s, CH, C4), 127.1 (s, CH, phenyl), 127.25 (s, CH, C11), 128.4 (s, CH, C5), 128.6 (s, CH, phenyl), 132.3 (s, CH, C3), 138.6 (s, C, C8), 144.7 (s, C, C1). HRMS (CI) [M+H]+ Calcd for C13H12BrN: 262.0231, found: 262.0226. Anal. found: C, 60.2; H, 4.8; N, 5.3. Calcd for C13H12BrN: C, 59.6; H, 4.6; N, 5.3%.

# *N*-benzyl-2-chloro-5-trifluoromethylaniline

#### Pale yellow oil (6.600g, 47%).

1H-NMR (CDCl3),  (ppm): 4.42 (s, 2H, CH2), 4.91 (br s, 1H, NH), 6.86 (m, 1H, CH), 6.90 (m, 1H, CH), 7.28-7.44 (m, 6H, CH). 13C-{1H}-NMR (CDCl3),  (ppm): 47.4 (s, CH2), 107.6 (q, 3*J*(CF) = 3.8 Hz, CH), 113.8 (q, 3*J*(CF) = 3.8 Hz, CH), 124.0 (q, 1*J*(CF) = 272.4 Hz, C, CF3), 127.4 (s, CH phenyl), 127.7 (s, CH), 128.8 (s, CH phenyl), 129.3 (s, CH), 130.2 (q, 2*J*(CF) = 32.4 Hz, C, C-CF3), 137.7 (s, C), 144.0 (s, C). HRMS (CI) [M]+ Calcd for C14H11ClF3N: 285.0532, found: 285.0506. Anal. found: C, 59.5; H, 4.0; N, 4.8. Calcd for C14H11ClF3N: C, 58.9; H, 3.9; N, 4.9%.

# 2-chloro-*N*-(4-methoxyphenyl)aniline

A schlenk tube was charged with 4-bromoanisole (1.5 ml, 12.18 mmol), 2-chloroaniline (1.4 ml, 13.31 mmol) sodium *t*-butoxide (0.860 g, 60.97 mmol), palladium acetate (0.110g, 0.49 mmol), tri-*t*-butylphosphine (0. 123g, 0.61 mmol) and toluene (50 ml). The reaction mixture was heated at reflux temperature for 22 hours. The reaction was quenched with a solution of hydrochloric acid (4 M, 30ml). The phases were separated and the aqueous phase was extracted with dichloromethane (5 x 50 ml). The organic extracts were combined, washed with water (3 x 50 ml), dried over magnesium sulphate, filtered though celite and the solvents were removed on a rotary evaporator. 2-Chloro-*N*-(4-methoxyphenyl)-aniline was obtained as a dark purple oil in quantitative yield.

1H-NMR (CDCl3),  (ppm): 3.83 (s, CH3, OCH3), 6.01 (s, 1H, NH), 6.73 (ddd, 4*J*(H4H6) = 1.55 Hz, *3J*(H4H5) = 7.3 Hz, 3*J*(H4H3) = 7.9 Hz, 1H, H4), 6.91 (d, 3*J*(H8H9) = 8.9 Hz, 2H, H9), 6.98 (dd, 4*J*(H6H4) = 1.55 Hz, 3*J*(H6H5) = 8.25 Hz, 1H, H6), 7.08 (ddd, 4*J*(H5H3) = 1.4 Hz, 3*J*(H5H4) = 7.3 Hz, 3*J*(H5H6) = 8.25 Hz, 1H, H5), 7.15 (d, 3*J*(H9H8) = 8.9 Hz, 2H, H8), 7.32 (dd, 4*J*(H3H5) = 1.4 Hz, 3*J*(H3H4) = 7.9 Hz). 13C-{1H}-NMR (CDCl3),  (ppm): 55.4 (s, OCH3), 113.6 (s, CH, C6), 114.6 (s, CH, C9), 118.9 (s, CH, C4), 119.8 (s, C2), 124.4 (s, CH, C8), 127.4 (s, CH, C5), 129.4 (s, CH, C3), 133.8 (s, C), 142.0 (s, C), 156.2 (s, C). HRMS (CI) [M+H]+ Calcd for C13H12ClNO: 234.0685, found: 234.0688. Anal. found: C, 66.9; H, 5.5; N, 6.2. Calcd for C13H12ClNO: C, 66.8; H, 5.2; N, 6.0%.

# *N*-benzyl-2-chloro-*N*-(4-methoxyphenyl)aniline

*N*-benzyl-2-chloro-*N*-(4-methoxyphenyl)aniline was synthesised by following the same procedure used for the synthesis of *N*-benzyl-2-haloanilines using 2-chloro-*N*-(4-methoxyphenyl)aniline(8.46 mmol).

Pale orange oil (0.860 g, 31.5%).

1H-NMR (CDCl3),  (ppm): 3.74 (s, 3H, CH3), 4.87 (s, 2H, CH2), 6.59 (d, 3*J*(H9H8) = 9.1 Hz, 2H, H8), 6.74 (d, 3*J*(H9H8) = 9.1 Hz, 2H, H9), 7.16 (ddd, 4*J*(H4H6) = 1.7 Hz, 3*J*(H4H5) = 7.3 Hz, 3*J*(H4H3) = 8.0 Hz, 1H, H4), 7.23-7.29 (m, 2H, H6 and H5), 7.29-7.36 (m, 3H, phenyl), 7.42-7.46 (m, 2H, phenyl), 7.48 (dd, 4*J*(H3H5) = 1.6 Hz, 3*J*(H3H4) = 8.0 Hz, 1H, H3). 13C-{1H}-NMR (CDCl3),  (ppm): 55.5 (s, CH3, OCH3), 56.7 (s, CH2), 114.3 (s, CH, C9), 116.5 (s, CH, C8), 126.7 (s, CH), 126.8 (s, CH), 126.9 (s, CH, phenyl), 127.95 (s, CH), 128.4 (s, CH, phenyl), 130.1 (s, CH), 131.0 (s, CH), 133.2 (s, C), 139.0 (s, C), 142.4 (s, C), 145.3 (s, C), 152.7 (s, C). HRMS (CI) [M+H]+ Calcd for C20H18ClNO: 324.1155, found: 324.1126. Anal. found: C, 75.5; H, 5.8; N, 4.3. Calcd for C20H18ClNO: C, 74.2; H, 5.6; N, 4.3%.

# General procedure for the catalytic synthesis of the carbazoles:

A mixture of the appropriate aryl bromide (1.22 mmol), the appropriate 2-haloaniline (1.30 mmol), sodium *t*-butoxide (0.586g, 6.10 mmol), palladium acetate (amount specified for each compound, see below), tri-*t*-butylphosphine (amount specified for each compound, see below) in toluene (13ml) was heated at reflux temperature 24 hours. The reaction was quenched with a solution of hydrochloric acid (3.5M, 10ml) and toluene was added (30 ml). The phases were separated and the aqueous phase was extracted with toluene (1 x 30 ml), dichloromethane (4 x 30 ml) and toluene (1 x 30 ml). The organic extracts were combined, dried over magnesium sulphate, filtered though celite and the solvents were removed on a rotary evaporator. The product was purified by column chromatography.

# 3-methoxy-9-methylcarbazole

Synthesised using the general method with 4 mol% Pd(OAc)2 (0.0110g) and 5 mol% P*t*Bu3 (0.0123g).

Pale yellow solid (0.121g, 47%).

1H-NMR (CDCl3),  (ppm): 3.83 (s, 3H, NCH3), 3.98 (s, 3H, OCH3), 7.17 (dd, 4*J*(H2H4) = 2.5 Hz, 3*J*(H2H1) = 8.8 Hz, 1H, H2), 7.24 (ddd, 4*J*(H6H8) = 1.1 Hz, 3*J*(H6H7) = 7.0 Hz, 3*J*(H6H5) = 7.8 Hz, 1H, H6), 7.33 (d, 3*J*(H1H2) = 8.8 Hz, 1H, H1), 7.40 (ddd, 5*J*(H8H5) = 0.8 Hz, 4*J*(H8H6) = 1.1 Hz, 3*J*(H8H7) = 8.2 Hz, 1H, H8), 7.50 (ddd, 4*J*(H7H5) = 1.2 Hz, 3*J*(H7H6) = 7.0 Hz, 3*J*(H7H8) = 8.2 Hz, 1H, H7), 7.63 (br d, 4*J*(H4H2) = 2.5 Hz,1H, H4), 8.10 (ddd, 5*J*(H5H8) = 0.8 Hz, 4*J*(H5H7) = 1.2 Hz, 3*J*(H5H6) = 7.8Hz,1H, H5). 13C-{1H}-NMR (CDCl3),  (ppm): 29.1 (s, CH3, NCH3), 56.1 (s CH3, OCH3), 103.3 (s, CH, C4), 108.5 (s, CH, C8), 109.0 (s, CH, C1), 114.7 (s, CH, C2), 118.3 (s, CH, C6), 120.2 (s, CH, C5), 122.5 (s, C), 122.9 (s, C), 125.6 (s, CH, C7), 136.0 (s, C), 141.4 (s, C), 153.5 (s,C). HRMS (CI) [M+H]+ Calcd for C14H13NO: 212.1075, found: 212.1088. Anal. found: C, 79.2; H, 6.4; N, 6.25. Calcd for C14H13NO: C, 79.6; H, 6.2; N, 6.6%.

# 2-methyl-9-methylcarbazole

Synthesised using the general method with 5 mol% Pd(OAc)2 (0.0137 g) and 7 mol% P*t*Bu3 (0.0173 g).

Pale yellow solid (0.134g, 57%).

1H-NMR (CDCl3),  (ppm): 2.62 (s, 3H, CH3), 3.84 (s, 3H, NCH3), 7.11 (ddd, *J* = 0.6 Hz, *J* = 1.4 Hz, 3*J*(H3H4) = 7.9 Hz, 1H, H3), 7.24 (br s, 1H, H1), 7.26 (ddd, 4*J*(H6H8) = 1.0 Hz, 3*J*(H6H7) = 7.1 Hz, 3*J*(H6H5) = 7.8 Hz, 1H, H6), 7.41 (br d, 3*J*(H8H7) = 8.2 Hz, 1H, H8), 7.49 (ddd, 4*J*(H7H5) = 1.2 Hz, 3*J*(H7H6) = 7.1 Hz, 3*J*(H7H8) = 8.2 Hz, 1H, H7), 8.02 (br d, 3*J*(H3H4) = 7.9 Hz, 1H, H4), 8.10 (ddd, *J* = 0.7 Hz, 4*J*(H5H7) = 1.2 Hz, 3*J*(H5H6) = 7.8 Hz, 1H, H5). 13C-{1H}-NMR (CDCl3),  (ppm): 22.2 (s, CH3, CH3), 28.9 (s, CH3, NCH3), 108.3 (s, CH, C8), 108.6 (s, CH, C1), 118.7 (s, CH, C6), 119.9 (s, CH), 119.9 (s, CH), 120.3 (s, CH), 120.4 (s, C), 122.8 (s, C), 125.05 (s, CH, C7), 135.8 (s, C), 141.0 (s, C), 141.4 (s, C). HRMS (CI) [M+H]+ Calcd for C14H13N: 196.1126, found: 196.1135. Anal. found: C, 85.6; H, 6.9; N, 6.9. Calcd for C14H13N: C, 86.1; H, 6.7; N, 7.2%.

# 9-benzyl-3-methoxycarbazole

Synthesised using the general method with 5 mol% Pd(OAc)2 (0.0137 g) and 7 mol% P*t*Bu3 (0.0173 g).

Pale yellow solid (0.140 g, 40%).

1H-NMR (CDCl3),  (ppm): 3.96 (s, 3H, OCH3), 5.52 (s, 2H, CH2), 7.10 (dd, 4*J*(H2H4) = 2.5 Hz, 3*J*(H2H1) = 8.8 Hz, 1H, H2), 7.15 (m, 2H, phenyl), 7.21-7.34 (m, 5H, H1, H6 and 3H phenyl), 7.37 (br d, 3*J*(H8H7) = 8.2 Hz, 1H, H8), 7.45 (ddd, 4*J*(H7H5) = 1.1 Hz, 3*J*(H7H8) = 8.2 Hz, 3*J*(H7H6) = 7.0 Hz, 1H, H7), 7.65 (d, 4*J*(H4H2) = 2.5 Hz, 1H, H4), 8.12 (ddd, *J* = 0.6 Hz, 4*J*(H5H7) = 1.1 Hz, 3*J*(H5H6) = 7.9 Hz, 1H, H5). 13C-{1H}-NMR (CDCl3),  (ppm): 46.5 (s, CH2), 56.0 (s, CH3), 103.3 (s, CH, C4), 108.9 (s, CH, C8), 109.6 (s, CH), 114.8 (s, CH, C2), 118.7 (s, CH), 120.3 (s, CH, C5), 122.7 (s, C), 123.3 (s, C), 125.8 (s, CH, C7), 126.3 (s, CH, C12), 127.3 (s, CH), 128.7 (s, CH, C13), 135.6 (s, C), 137.3 (s, C), 141.1 (s, C), 153.7 (s, C). HRMS (CI) [M+H]+ Calcd for C20H17NO: 288.1388, found: 288.1386. Anal. found: C, 82.2; H, 5.9; N, 4.65. Calcd for C20H17NO: C, 83.6; H, 6.0; N, 4.9%.

# 9-benzyl-2-trifluoromethyl-6-methoxycarbazole

Synthesised using the general method with 5 mol% Pd(OAc)2 (0.0137 g) and 7 mol% P*t*Bu3 (0.0173 g).

Colourless solid (0.115 g, 26.5 %).

1H-NMR (CDCl3),  (ppm): 3.95 (s, 3H, OCH3), 5.54 (s, 2H, CH2), 7.12 (m, 2H, phenyl), 7.14 (dd, 4*J*(H7H5) = 2.5 Hz, 3*J*(H7H8) = 8.9 Hz, 1H, H7), 7.21-7.34 (m, 4H, H8 and 3H phenyl), 7.47 (br d, 3*J*(H3H4) = 8.2 Hz, 1H, H3), 7.62 (br s, 1H, H1), 7.64 (d, 4*J*(H5H7) = 2.5 Hz, 1H, H5), 8.17 (d, 3*J*(H4H3) = 8.2 Hz, 1H, H4). 13C-{1H}-NMR (CDCl3),  (ppm): 46.7 (s, CH2), 56.0 (s, CH3), 103.4 (s, CH, C5), 106.1 (q, 3*J*(CF) = 4.3 Hz, CH, C1), 110.2 (s, CH, C8), 115.4 (q, 3*J*(CF) = 3.6 Hz, CH, C3), 116.6 (s, CH, C7), 120.6 (s, CH, C4), 122.4 (s, C), 124.8 (q, 1*J*(CF) = 272.0 Hz, C, CF3), 125.3 (q, 4*J*(CF) = 1.1 Hz, C, C9a), 126.2 (s, CH, phenyl), 127.5 (q, 2*J*(CF) = 31.9 Hz, C, C2), 127.7 (s, CH, phenyl), 128.9 (s, CH, phenyl), 136.5 (s, C), 136.6 (s, C), 140.2 (s, C), 154.2 (s, C). HRMS (CI) [M+H]+ Calcd for C21H16F3NO: 356.1262, found: 356.1258. Anal. found: C, 70.6; H, 4.4; N, 3.7. Calcd for C21H16F3NO: C, 71.0; H, 4.5; N, 3.9%.

# 9-benzyl-2-trifluoromethyl-7-methylcarbazole

Synthesised using the general method with 5 mol% Pd(OAc)2 (0.0137 g) and 7 mol% P*t*Bu3 (0.0173 g).

Colourless solid (0.211 g, 51%).

1H-NMR (CDCl3),  (ppm): 2.55 (s, 3H, CH3), 5.53 (s, 2H, CH2), 7.11-7.17 (m, 3H, H6 and 2H phenyl), 7.21 (s, 1H, H8), 7.26-7.32 (m, 3H, phenyl), 7.49 (d, 3*J*(H3H4) = 8.2 Hz, 1H, H3), 7.60 (s, 1H, H1), 8.05 (d, 3*J*(H5H6) = 7.9 Hz, 1H, H5), 8.16 (d, 3*J*(H4H3) = 8.2 Hz, 1H, H4). 13C-{1H}-NMR (CDCl3),  (ppm): 22.3 (s, CH3), 46.5 (s, CH2), 105.9 (q, 3*J*(CF) = 4.1 Hz, CH, C1), 109.4 (s, CH, C8), 115.9 (q, 3*J*(CF) = 3.8 Hz, CH, C3), 119.8 (s, C), 120.25 (s, CH, C4), 120.7 (s, CH, C5), 121.6 (s, CH, C6), 124.9 (q, 1*J*(CF) = 272.3 Hz, C, CF3), 125.7 (q, 4*J*(CF) = 1.5 Hz, C, C9a), 126.2 (s, CH, phenyl), 127.05 (q, 2*J*(CF) = 32.0 Hz, C, **C**-CF3), 127.6 (s, CH, phenyl), 128.9 (s, CH, phenyl), 136.5 (s, C), 137.6 (s, C), 139.8 (s, C), 142.05 (s, C). HRMS (CI) [M+H]+ Calcd for C21H16F3N: 340.1313, found: 340.1325. Anal. found: C, 74.0; H, 4.6; N, 3.8. Calcd for C21H16F3N: C, 74.3; H, 4.75; N, 4.1%.

**9-methylcarbazole**

Synthesised using the general method with 5 mol% Pd(OAc)2 (0.0137 g) and 7 mol% P*t*Bu3 (0.0173 g).

Colourless solid (0.135 g, 61%).

1H-NMR (CDCl3),  (ppm): 3.88 (s, 3H, CH3), 7.21-7.29 (m, 2H, CH), 7.42 (d, 3*J*(HH) = 8.2 Hz, 2H, CH), 7.50 (m, 2H, CH), 8.11 (d, 3*J*(HH) = 7.7 Hz, 2H, CH).

# 2-chloro-5-trifluoromethyl-*N*-(4-methoxyphenyl)aniline

Synthesised using the general method with 5 mol% Pd(OAc)2 (0.0137 g) and 7 mol% P*t*Bu3 (0.0173 g).

Dark red oil (0.313 g, 85%).

1H-NMR (CDCl3),  (ppm): 3.85 (s, 3H, OCH3), 6.12 (br s, 1H, NH), 6.93-6.98 (m and d, 3*J*(H8H9) = 8.9 Hz, H, H9 and H4), 7.13 (d, 4*J*(H6H4) = 2.0 Hz, 1H, H6), 7.16 (d, 3*J*(H8H9) = 8.9 Hz,2H, H8), 7.42 (dq, 5*J*(HF) = 0.8 Hz, 3*J*(H3H4) = 8.3 Hz, H3). 13C-{1H}-NMR (CDCl3),  (ppm): 55.5 (s, OCH3), 109.6 (q, 3*J*(CF) = 3.9 Hz, CH, C6), 115.0 (q, 3*J*(CF) = 4.0 Hz, CH, C4), 115.0 (s, CH, C9), 122.6 (q, 4*J*(CF) = 1.5 Hz, C, C1), 123.8 (q, 1*J*(CF) = 272.4 Hz, CF3), 125.4 (s, CH, C8), 129.8 (s, CH, C3), 130.0 (q, 2*J*(CF) = 32.4 Hz, C, C5), 132.5 (s, C), 142.8 (s, C), 157.1 (s, C). HRMS (CI) [M+H]+ Calcd for C14H11ClF3NO: 302.0559, found: 302.0564. Anal. found: C, 54.5; H, 3.7; N, 4.4. Calcd for C14H11ClF3NO: C, 55.7; H, 3.7; N, 4.6%.
